# Supplementary material for: Wastewater-Irrigated Vegetables Are a Significant Source of Heavy Metal Contaminants: Toxicity and Health Risks
Source: MDPI journal article supplement (doi:10.3390/molecules28031371), 2023-02-01
Supplement: s1 [file s1]

**Table S1.** Two factor analysis of variance for concentration (mg/kg) of heavy metals in collected vegetable samples.

| Vegetables   | Source of variation | <i>SS</i> | <i>df</i> | <i>MS</i> | <i>F</i> | Sig. |
|--------------|---------------------|-----------|-----------|-----------|----------|------|
| Apple gourd  | Corrected models    | 205.68    | 17        | 12.10     | 9565.94  | 0.00 |
|              | Parts               | 12.14     | 2         | 6.07      | 4798.99  | 0.00 |
|              | Metals              | 142.28    | 5         | 28.46     | 22498.47 | 0.00 |
|              | Error               | 0.05      | 36        | 0.001     |          |      |
|              | Total               | 380.37    | 54        |           |          |      |
| Spinach      | Corrected models    | 243.49    | 17        | 14.32     | 6778.69  | 0.00 |
|              | Parts               | 10.23     | 2         | 5.12      | 2421.82  | 0.00 |
|              | Metals              | 159.47    | 5         | 31.89     | 15094.86 | 0.00 |
|              | Error               | 0.08      | 36        | 0.002     |          |      |
|              | Total               | 447.66    | 54        |           |          |      |
| Cauliflower  | Corrected models    | 51.11     | 17        | 3.01      | 285.14   | 0.00 |
|              | Parts               | 6.09      | 2         | 3.05      | 289.07   | 0.00 |
|              | Metals              | 30.15     | 5         | 6.03      | 571.94   | 0.00 |
|              | Error               | 0.38      | 36        | 0.01      |          |      |
|              | Total               | 162.61    | 54        |           |          |      |
| Sponge gourd | Corrected models    | 66.69     | 17        | 3.92      | 193.51   | 0.00 |
|              | Parts               | 3.41      | 2         | 1.70      | 84.03    | 0.00 |
|              | Metals              | 44.27     | 5         | 8.85      | 436.76   | 0.00 |
|              | Error               | 0.73      | 36        | 0.02      |          |      |
|              | Total               | 207.87    | 54        |           |          |      |
| Coriander    | Corrected models    | 79.88     | 17        | 3.92      | 193.51   | 0.00 |
|              | Parts               | 3.442     | 2         | 1.70      | 84.03    | 0.00 |
|              | Metals              | 48.81     | 5         | 8.85      | 436.76   | 0.00 |
|              | Error               | 0.46      | 36        | 0.02      |          |      |
|              | Total               | 187.59    | 54        |           |          |      |

*SS*, total sum of squares; *df*, number of degrees of freedom; *M*, mean square, *F*-distribution.
